# Supplementary material for: The regenerative capacity of the zebrafish heart is dependent on TGFβ signaling
Source: Oxford University Press journal article supplement (doi:10.1242/dev.078543), 2012-04-19
Supplement: dev078543figs7.pdf [file dev078543figs7.pdf]

A

```

Alk5_Homo      IVLQESIGKGRFGEVWRGKWRGEEVAVKIFSSREERSWFRFAEIYQTVML 254
Alk5b_Danio   IILQESIGKGRFGEVWRGRWRGEEVAVKIFSSREERSWFRFAEIYQTVML 256
Alk5a_Danio   IILQESIGKGRFGEVWRGRWRGEEVAVKIFSSREERSWFRFAEIYQTVML 251
Alk4_Danio    IVLQEIIGKGRFGEVWRGRWRGDDVAVKIFSSREERSWFRFAEIYQTIML 256
*:**:*:*****:***:*:*****:*****:***

Alk5_Homo      RHENILGFIAADNKDNGTWTQLWLVSDYHEHGSLFDYLNRYTVTVEGMIK 304
Alk5b_Danio   RHENILGFIAADNKDNGTWTQLWLVSDYHEHGSLFDYLNRYTVTVEGMIK 306
Alk5a_Danio   RHENILGFIAADNKDNGTWTQLWLVSDYHEHGSLFDYLNRYTVTVEGMIK 301
Alk4_Danio    RHENILGFIAADNKDNGTWTQLWLVSDYHEHGSLFDYLNRYTVTVEGMIK 306
*****:***:*****

Alk5_Homo      LALSTASGLAHLHMEIVGTQGKPAIAHRDLKSKNILLVKKNGTCCIADLGL 354
Alk5b_Danio   LSLSTASGLAHLHMEIVGTQGKPAIAHRDLKSKNILLVKKNGTCCIADLGL 356
Alk5a_Danio   LSLSTASGLAHLHMEIVGTQGKPAIAHRDLKSKNILLVKKNGTCCIADLGL 351
Alk4_Danio    LLSLSAASGLAHLHMEILGTQGKPGIAHRDLKSKNILLVKKNGIFAIAIDLGL 356
*:**:*:*****:*****:*****:*****:*****

Alk5_Homo      AVRHDSATDTIDIAPNHRVGTKRYMAPEVLDDSDINMKHFESFKRADIYAM 404
Alk5b_Danio   AVRHDSATDTIDIAPNHRVGTKRYMAPEVLDDSDINMKHFESFKRADIYAM 406
Alk5a_Danio   AVRHDSATDTIDIAPNHRVGTKRYMAPEVLDDSDINMRHFESFKRADIYAL 401
Alk4_Danio    AVRHESITDTIDIAPNQRVGTKRYMAPEVLDETINMKHFDSFKCADIYAL 406
***:*:*****:*****:***:***:***:*****

Alk5_Homo      GLVFWEIARRCSIGGIHEDYQLPYDYLVPDPSVEEMRQVCEQKLRPNI 454
Alk5b_Danio   GLVFWEIASRCSIGGIHEDYQLPYHDLVQSDPSVEEMRQVCEQKLRPNI 456
Alk5a_Danio   GLVFWEIARRCSIGGIHEDYQLPYDYLVPDPSVEDMQRVQDQKLRPNI 451
Alk4_Danio    GLVYWEIARRCNAGGIHEDYKLPYDYLVPDPSIEEMRQVQDQRLRPKW 465
***:*** ** *:***:***:***:***:***:***:***:***:***

Alk5_Homo      PNRWQSCEALRVMKIMRECWYANGAARLTALRIKKTLSQL 495
Alk5b_Danio   PNRWQSCEALRVMKIMRECWYANGAARLTALRIKKTLSQL 497
Alk5a_Danio   PNRWQSCEALRVMKIMRECWYANGARLTALRVKKSLSQL 493
Alk4_Danio    PNWWQSYEALRVMGKIMRECWYANGAARLTALRIKKTLSQL 497
** ** *:*:*****:*****:*****:***:***

```

B

```

Alk5_Homo      IVLQESIGKGRFGEVWRGKWRGEEVAVKIFSSREERSWFRFAEIYQTVML 254
Bmpr1a_Danio  IQTVRMIGKGRYGEVWLGRWRGEEKVAVKVFVFTREEASWFRFTEIYQTVLM 228
Bmpr1b_Danio  IQMVTQIGKGRYGEVWMGRWRGEEKVAVKVFVFTTEEASWFRFTEIYQTVLM 232
*****:*** *:***:***:* : ** *:*:*****:

Alk5_Homo      RHENILGFIAADNKDNGTWTQLWLVSDYHEHGSLFDYLNRYTVTVEGMIK 304
Bmpr1a_Danio  RHENILGFIAADINGTGASTQLYLITDYHENGSLYDYLKFTTLDLDTQALLR 278
Bmpr1b_Danio  RHDNILGFIAADIKGTGSWTQLYLITDYHENGSLYDYLKCTTLDLSDRAMLK 282
**:*:***** :..*: ***:***:***:***:***: * : ..:::

Alk5_Homo      LALSTASGLAHLHMEIVGTQGKPAIAHRDLKSKNILLVKKNGTCCIADLGL 354
Bmpr1a_Danio  LAFSAACGLCHLHTEIYGTQGKPAIAHRDLKSKNILLKKNGTCCIADLGL 328
Bmpr1b_Danio  LAYSSVSGLCHLHTEIFGTQGKPAIAHRDLKSKNILLVKNRGACCIADLGL 332
** *:.**.* ** *:*****:***:***:*****

```
