# Supplementary material for: The regenerative capacity of the zebrafish heart is dependent on TGFβ signaling
Source: Oxford University Press journal article supplement (doi:10.1242/dev.078543), 2012-04-19
Supplement: dev078543tables1.pdf [file dev078543tables1.pdf]

**Table S1. Primers for PCR amplification of genes to generate antisense probes for in situ hybridization**

| <b>Gene</b>       | <b>Gene ID</b> | <b>Forward primer</b> | <b>Reverse primer</b> | <b>Product (bp)</b> |
|-------------------|----------------|-----------------------|-----------------------|---------------------|
| <i>vmhc</i>       | NM_001112733   | CTGCACTCCCAGAACACAAG  | TCAACCAGATCTTGCAGACG  | 461                 |
| <i>tgfb1</i>      | NM_182873      | TGCAGGATGAGGATGAGGAC  | CTGTGTACCCGCAATCCTTG  | 780                 |
| <i>tgfb2</i>      | NM_194385      | ACGCCAAAGAAGTGCACAAG  | CTGTCCGTATCTGTGGAGCG  | 762                 |
| <i>tgfb3</i>      | NM_194386      | AACCTGAGCACCTCCAGGAC  | GCTGCACTTGCAGGATTG    | 765                 |
| <i>activin-βA</i> | NM_130916      | GGGATCCTCCTGCTGCTAAT  | AGTGGAAAGGACAGCGAGTTG | 991                 |
| <i>activin-βB</i> | NM_131068      | AAGATTCGGGGAGAATGGAC  | GTTAGGCACGTCACGTTTGA  | 1004                |
| <i>alk4</i>       | NM_130990      | CAACAGCATCAACCTCCAGA  | CGGCACCAGGTCATAGTAGG  | 1000                |
| <i>alk5a</i>      | NM_001037683   | TCGTGTGCCAAGTGAAGAAG  | CATGATCTTGCCATCACAC   | 946                 |
| <i>alk5b</i>      | NM_001115059   | GGTGTGTGTGCTGTGTTCC   | ACTGACGGGTCTGACTGGAC  | 915                 |

To generate antisense probes, the reverse primers were synthesized with addition of the promoter for T3 polymerase.
