# Supplementary figures and images for: The regenerative capacity of the zebrafish heart is dependent on TGFβ signaling
Source: Oxford University Press journal article supplement (doi:10.1242/dev.078543), 2012-04-19

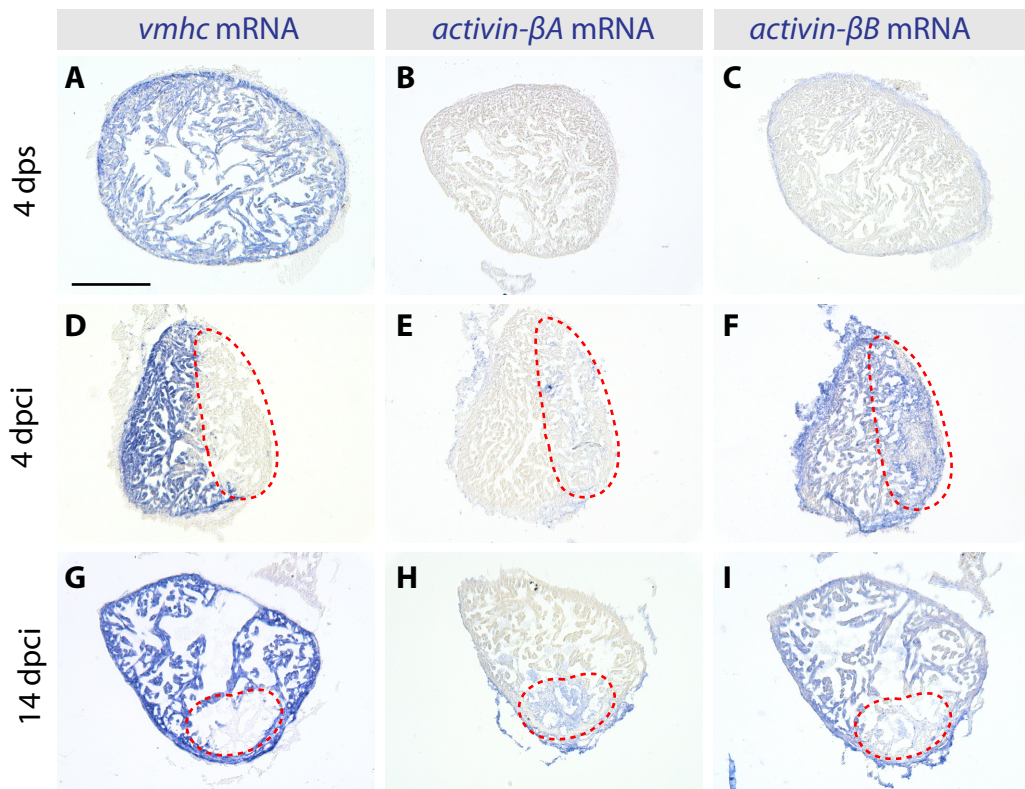

Supplement: dev078543figs1.pdf [file dev078543figs1.pdf]

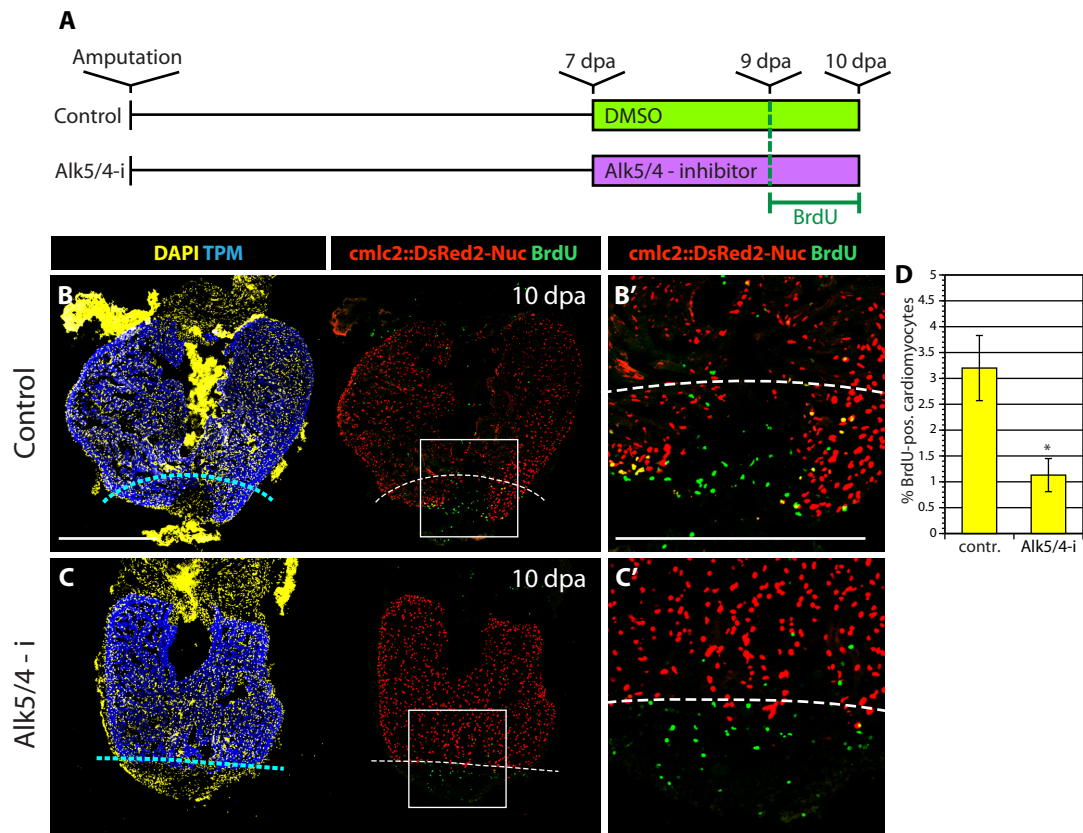

Supplement: dev078543figs10.pdf [file dev078543figs10.pdf]

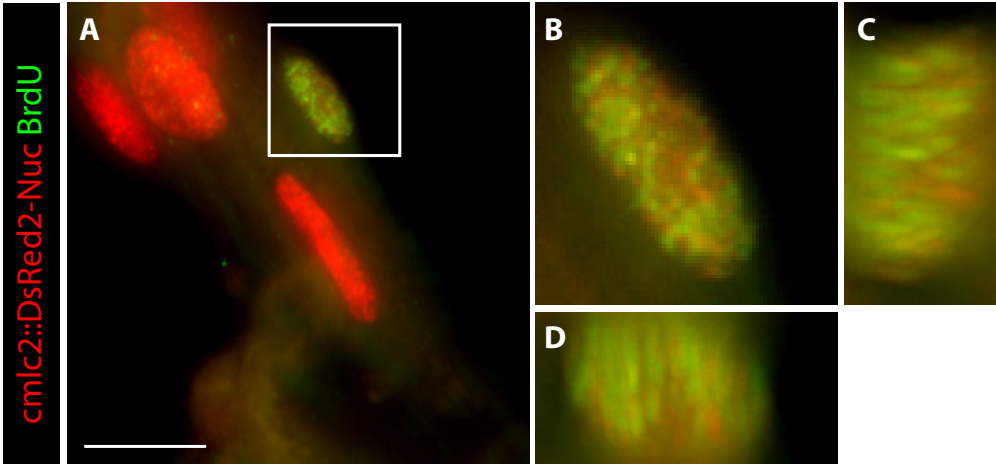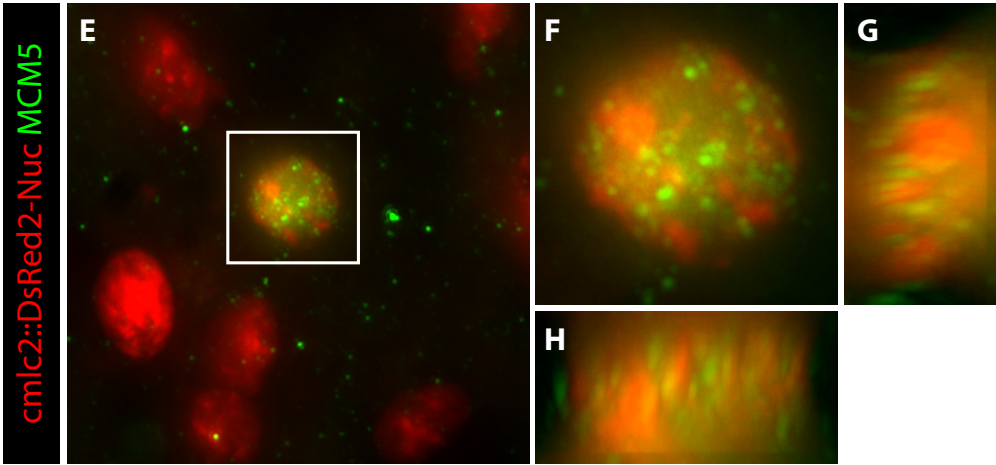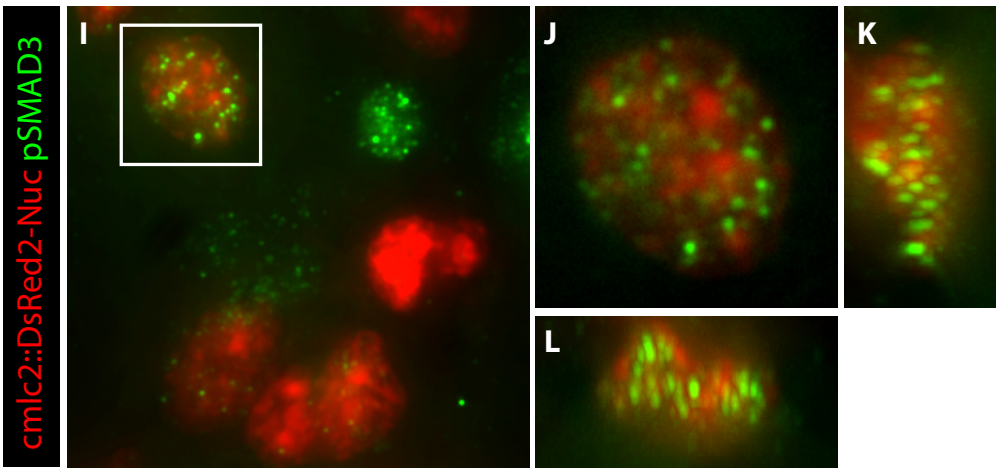

Supplement: dev078543figs11.pdf [file dev078543figs11.pdf]

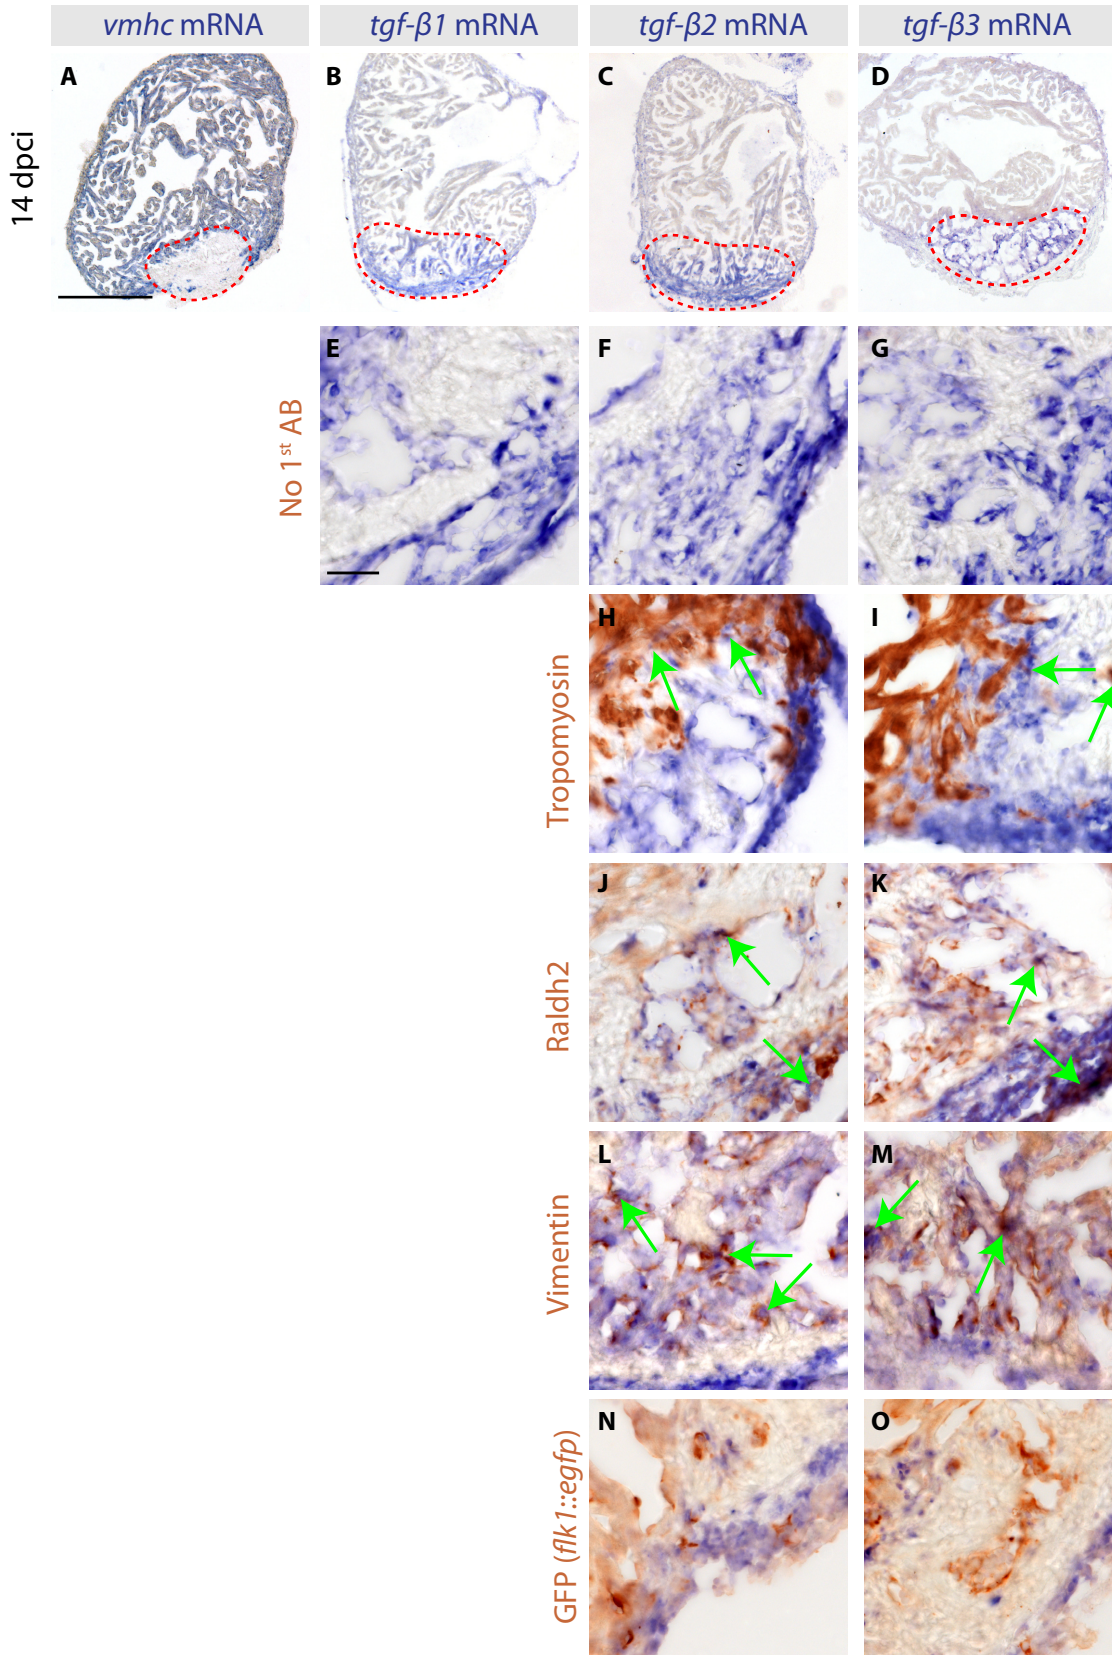

Supplement: dev078543figs2.pdf [file dev078543figs2.pdf]

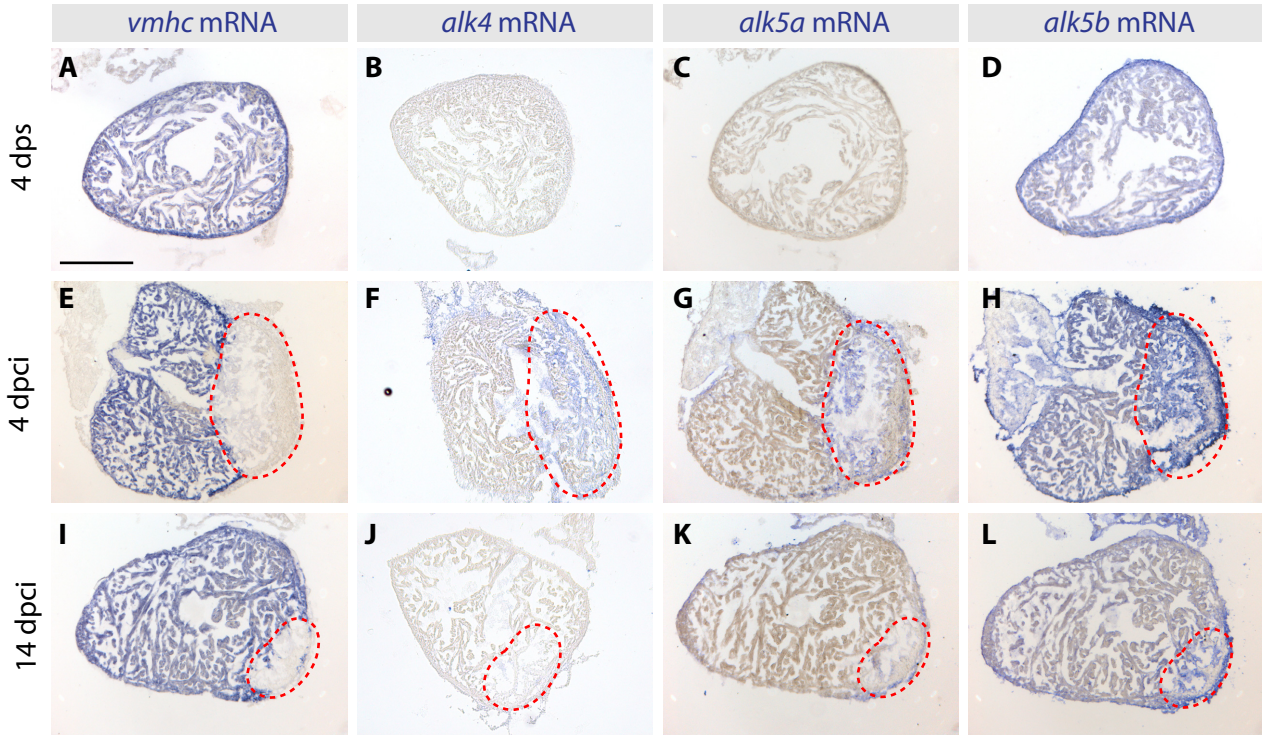

Supplement: dev078543figs3.pdf [file dev078543figs3.pdf]

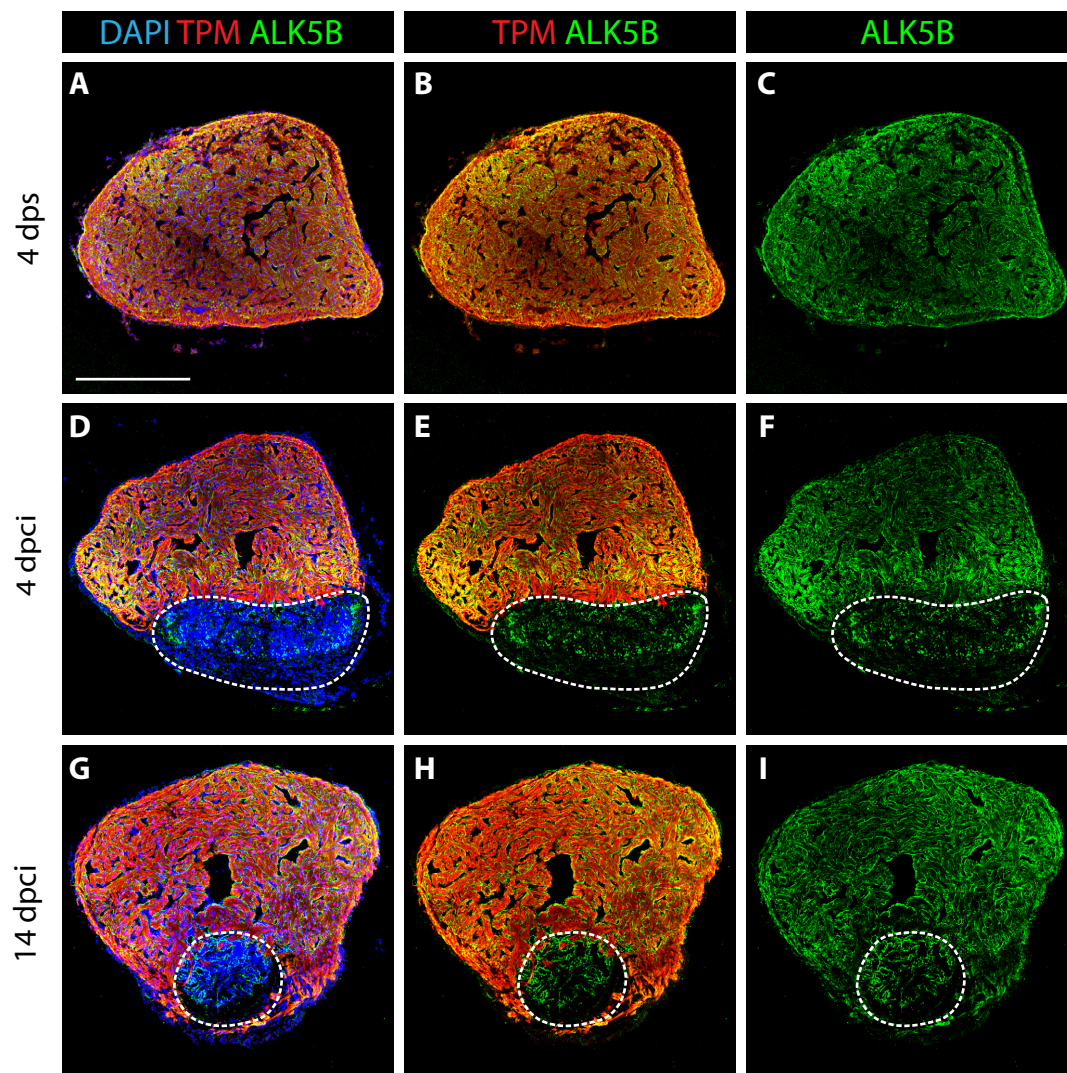

Supplement: dev078543figs4.pdf [file dev078543figs4.pdf]

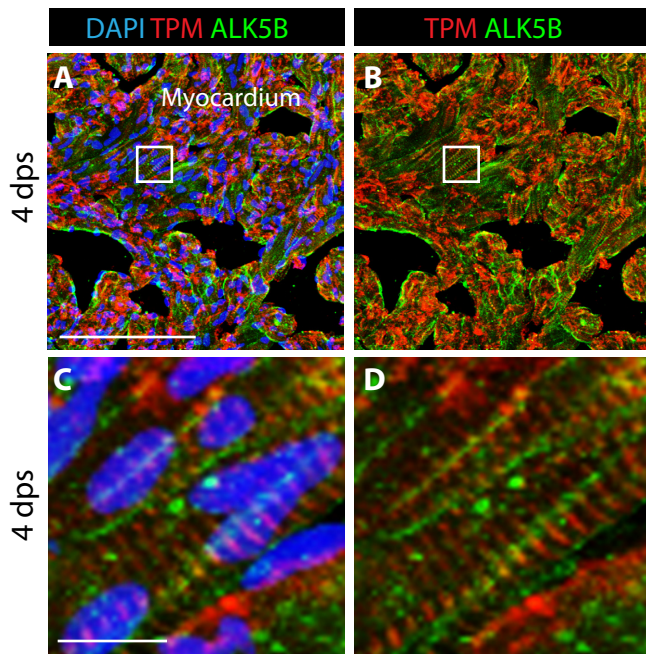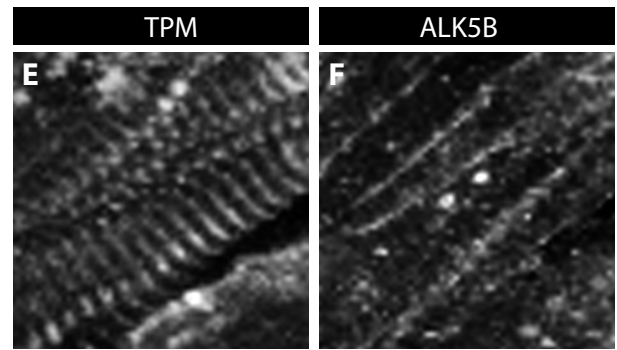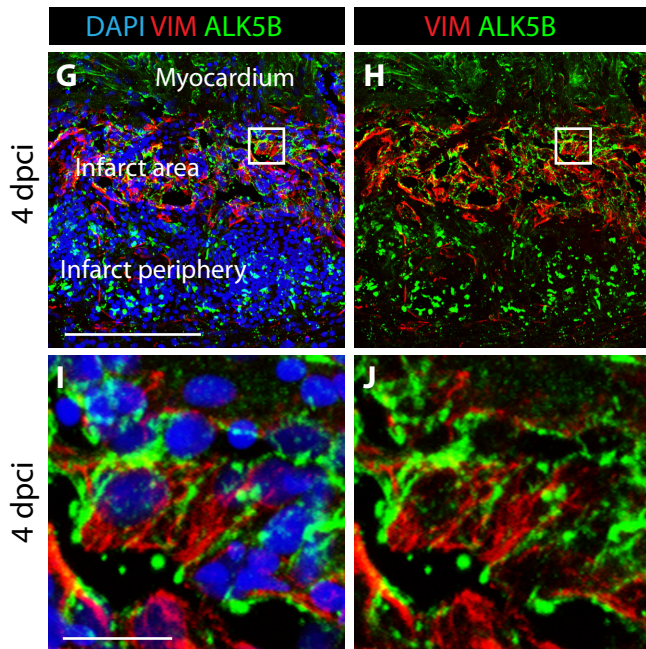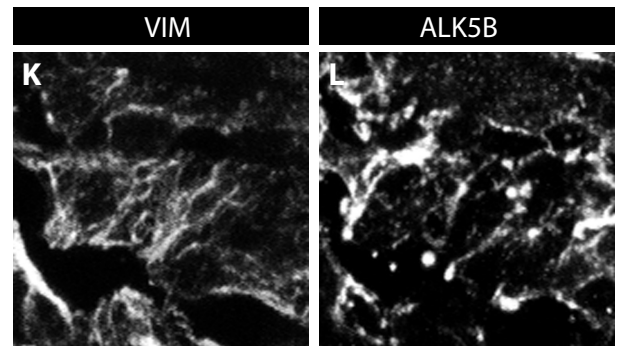

Supplement: dev078543figs5.pdf [file dev078543figs5.pdf]

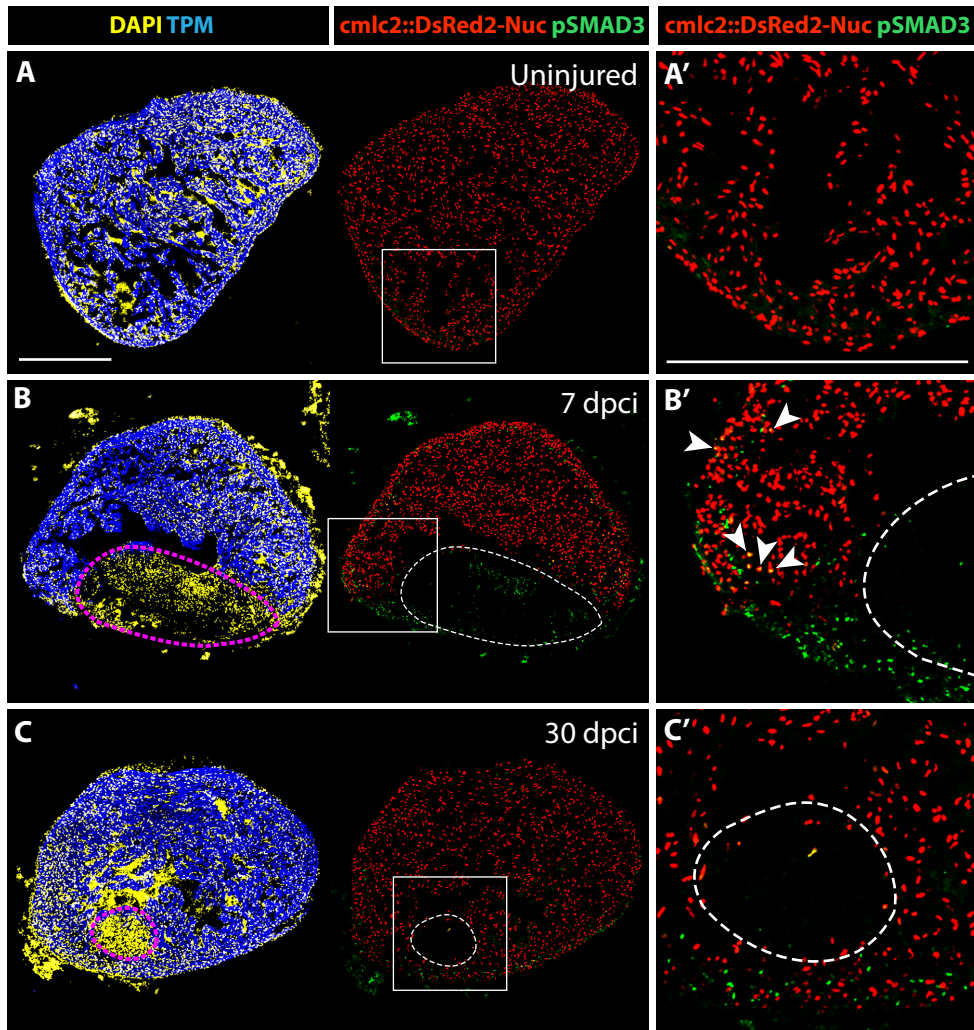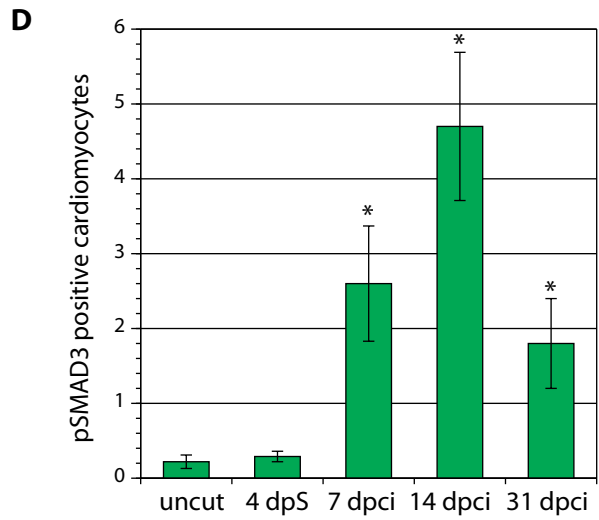

Supplement: dev078543figs6.pdf [file dev078543figs6.pdf]

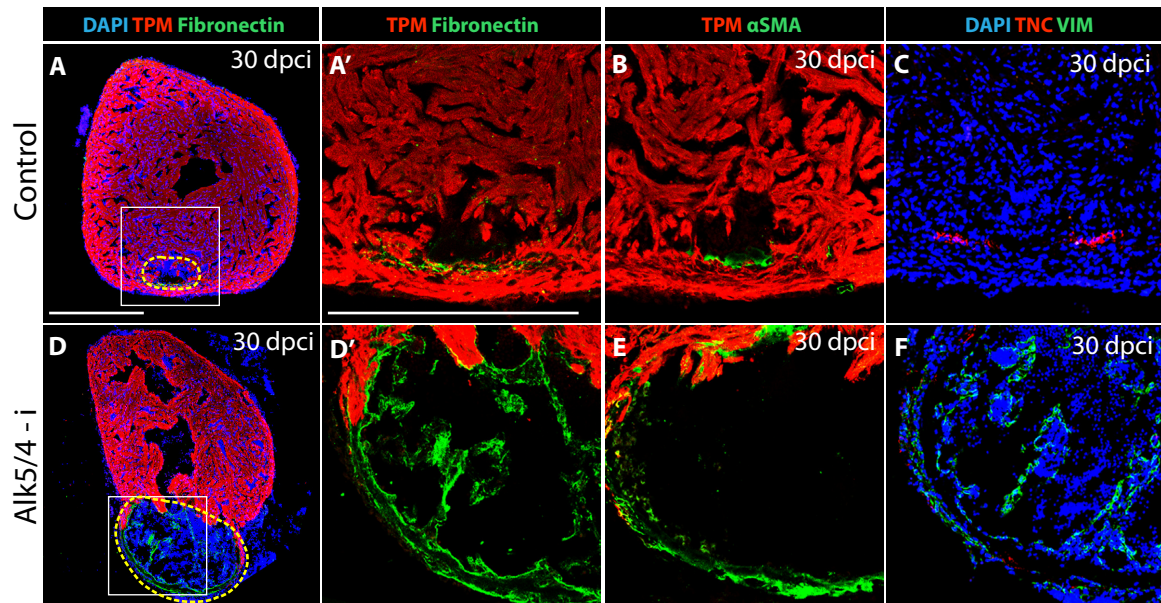

Supplement: dev078543figs8.pdf [file dev078543figs8.pdf]

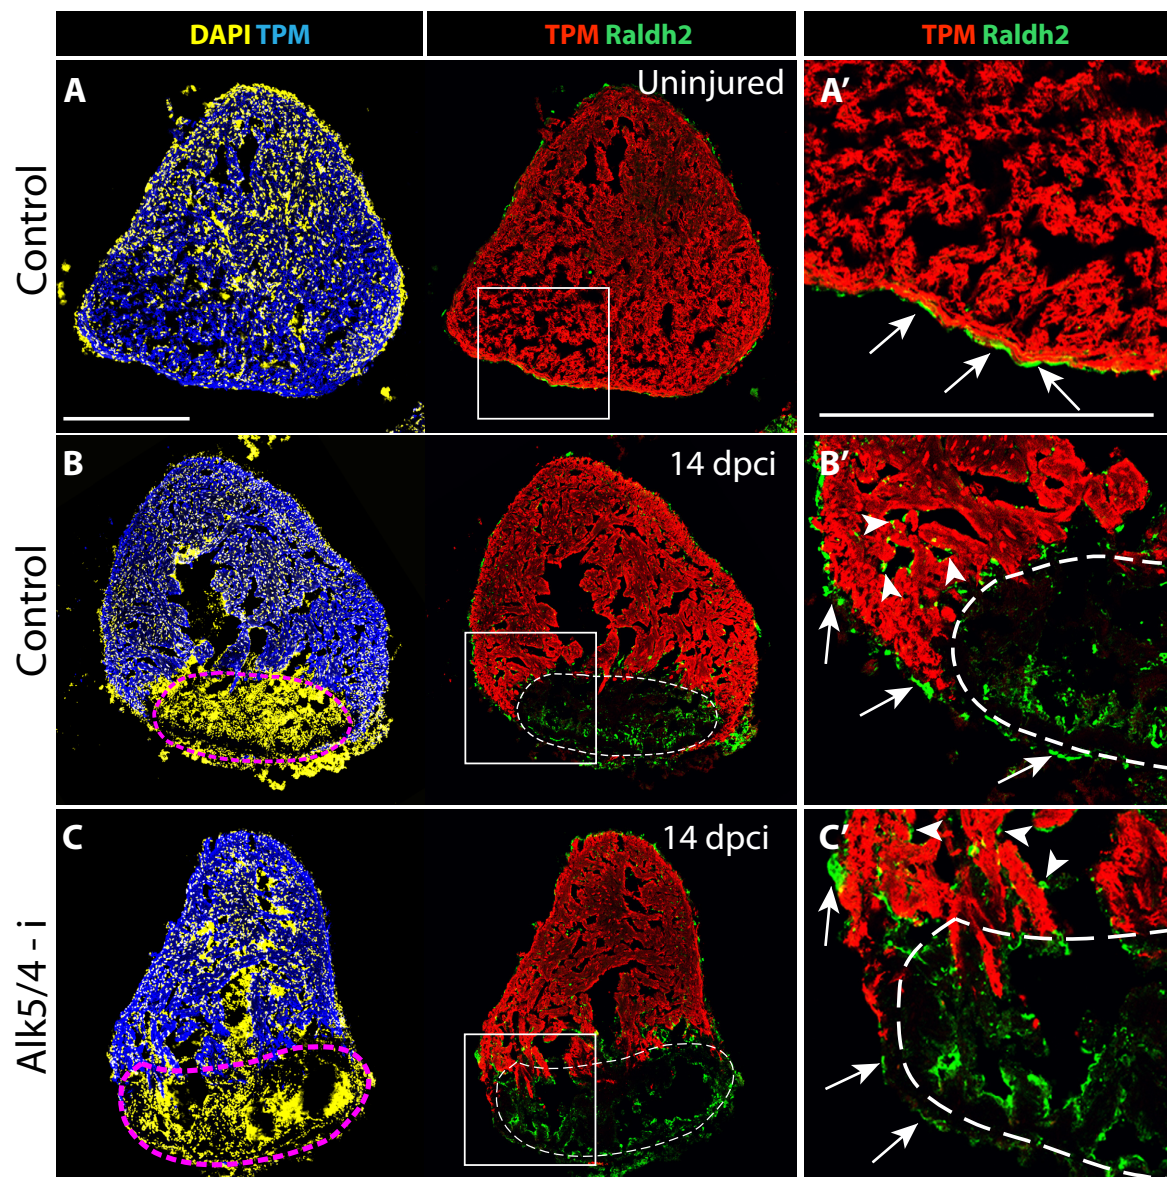

Supplement: dev078543figs9.pdf [file dev078543figs9.pdf]
